# Supplementary material
Source: MDPI journal article supplement (https://www.mdpi.com/search?q=jmse-09-00100)
Supplement: s001 [file jmse-09-00100-s001.pdf]

**Supplementary materials: Year of plantation, hydrological parameters, slope, and elevation profiles of mangrove sites in Qatar**

**Table S1.** Year of plantation for afforested (planted) mangrove in Qatar.

| <b>Site Name</b> | <b>Status</b> | <b>Tree Height range (m)</b> | <b>Planted year</b> |
|------------------|---------------|------------------------------|---------------------|
| Al Khor          | Natural       | 1-5                          | Natural forest      |
| Al Dhakhira      | Natural       | 1-5                          | Natural forest      |
| Semaisma         | Planted       | 1-2.7                        | 1983                |
| Al Mafyar        | Planted       | 1-3                          | 1981                |
| Fuwairit         | Planted       | 1.5-3                        | 1981                |
| Ras Laffan       | Planted       | 1-3                          | 1993                |
| Al Wakra         | Planted       | 1-3                          | 1989                |
| Umm Al Hul       | Planted       | 1-3                          | 1981                |
| Zekreet          | Planted       | 0.5-0.70 m                   | 1990                |
| Khor Al Adaid    | Planted       | 0.5-0.70 m                   | 1993                |

**Table S2.** Hydrological parameters for the sampled mangrove sites in Qatar

| <b>SITE</b>   | <b>Season</b> | <b>Month</b> | <b>Air Temp. (°C)</b> | <b>sea Temp. (°C)</b> | <b>SALINTY ‰</b> | <b>pH</b> | <b>Dissolved Oxygen (mg/L)</b> |
|---------------|---------------|--------------|-----------------------|-----------------------|------------------|-----------|--------------------------------|
| Al Dhakhira   | Summer        | August       | 44.1                  | 33.3                  | 44.2             | 8.24      | 5.21                           |
| Al Khor       | Summer        | August       | 43.5                  | 33.2                  | 44.8             | 8.25      | 5.22                           |
| Semaisma      | Summer        | August       | 43.3                  | 33.3                  | 44.2             | 8.3       | 5                              |
| Fuwairit      | Summer        | August       | 42.8                  | 33.3                  | 44.1             | 8.23      | 5.03                           |
| Al Mafyar     | Summer        | August       | 43.2                  | 33.2                  | 44.5             | 8.2       | 5.16                           |
| Zekreet       | Summer        | August       | 43.4                  | 35.5                  | 59.1             | 8.31      | 4.54                           |
| Ras Laffan    | Summer        | August       | 43                    | 33.5                  | 43.6             | 8.2       | 4.85                           |
| Al Wakra      | Summer        | August       | 43.5                  | 33                    | 44.5             | 8.2       | 4.52                           |
| Umm AlHul     | Summer        | August       | 43.8                  | 33.5                  | 44.2             | 8.2       | 4.62                           |
| Khor Al Adaid | Summer        | August       | 44.5                  | 33.57                 | 54.83            | 8.04      | 5.27                           |
|               |               |              |                       |                       |                  |           |                                |
| <b>SITE</b>   | <b>Season</b> | <b>Month</b> | <b>Air Temp. (°C)</b> | <b>sea Temp. (°C)</b> | <b>SALINTY ‰</b> | <b>pH</b> | <b>Dissolved Oxygen (mg/L)</b> |
| Al Dhakhira   | Autumn        | October      | 36.9                  | 29.6                  | 44.91            | 8.23      | 5.34                           |
| Al Khor       | Autumn        | October      | 37.2                  | 29.4                  | 44.82            | 8.24      | 5.36                           |
| Semaisma      | Autumn        | October      | 36.7                  | 29.4                  | 44.5             | 8.31      | 5.28                           |
| Fuwairit      | Autumn        | October      | 35.4                  | 30.4                  | 44.11            | 8.25      | 6.28                           |
| Al Mafyar     | Autumn        | October      | 34.8                  | 30.42                 | 45.1             | 8.27      | 5.34                           |
| Zekreet       | Autumn        | October      | 35.4                  | 34.8                  | 49.3             | 8.37      | 5.1                            |
| Ras Laffan    | Autumn        | October      | 34.5                  | 30.2                  | 43.5             | 8.11      | 5.2                            |
| Al Wakra      | Autumn        | October      | 35.5                  | 30.1                  | 43.6             | 8.2       | 5                              |
| Umm Al Hul    | Autumn        | October      | 35.8                  | 30.25                 | 43.6             | 8.2       | 5.1                            |
| Khor Al Adaid | Autumn        | October      | 36.5                  | 29.3                  | 50.34            | 8.29      | 5.03                           |
|               |               |              |                       |                       |                  |           |                                |
| <b>SITE</b>   | <b>Season</b> | <b>Month</b> | <b>Air Temp. (°C)</b> | <b>sea Temp. (°C)</b> | <b>SALINTY ‰</b> | <b>pH</b> | <b>Dissolved Oxygen (mg/L)</b> |
| Al Dhakhira   | Winter        | January      | 25.6                  | 21.81                 | 41.56            | 8.21      | 6.14                           |
| Al Khor       | Winter        | January      | 24.8                  | 22.62                 | 41.44            | 8.23      | 6.31                           |
| Semaisma      | Winter        | January      | 25.2                  | 22.45                 | 42.32            | 8.23      | 6.12                           |
| Fuwairit      | Winter        | January      | 25.1                  | 21.81                 | 42.64            | 8.23      | 6.01                           |
| Al Mafyar     | Winter        | January      | 24.5                  | 22.12                 | 42.41            | 8.21      | 6.21                           |
| Zekreet       | Winter        | January      | 23.6                  | 20.91                 | 51.77            | 8.2       | 5.41                           |
| Ras Laffan    | Winter        | January      | 24.2                  | 22.22                 | 50.13            | 8.12      | 6.54                           |
| Al Wakra      | Winter        | January      | 25.6                  | 22.1                  | 43.5             | 8.22      | 6.61                           |
| Umm Al Hul    | Winter        | January      | 26.05                 | 22.5                  | 43.25            | 8.2       | 6.6                            |
| Khor Al Adaid | Winter        | January      | 26.5                  | 22.2                  | 50.13            | 8.12      | 6.52                           |

| SITE          | Season | Month | Air Temp. (°C) | sea Temp. (°C) | SALINTY ‰ | pH   | Dissolved Oxygen (mg/L) |
|---------------|--------|-------|----------------|----------------|-----------|------|-------------------------|
| Al Dhakhira   | Spring | April | 28.5           | 31.21          | 43.54     | 8.12 | 6.43                    |
| Al Khor       | Spring | April | 27.9           | 31.34          | 44.21     | 8.21 | 5.76                    |
| Semaisma      | Spring | April | 33.12          | 31.1           | 44.32     | 8.23 | 5.11                    |
| Fuwairit      | Spring | April | 32             | 30.2           | 43.33     | 8.12 | 5.01                    |
| Al Mafyar     | Spring | April | 33.1           | 31.2           | 44.54     | 8.24 | 5.04                    |
| Zekreet       | Spring | April | 33.4           | 30.3           | 55.81     | 8.34 | 5.01                    |
| Ras Laffan    | Spring | April | 32.5           | 28.5           | 44        | 8.1  | 5.8                     |
| Al Wakra      | Spring | April | 33.52          | 29.1           | 43.5      | 8.2  | 5.5                     |
| Umm Al Hul    | Spring | April | 33.2           | 29.5           | 43.2      | 8.15 | 5.45                    |
| Khor Al Adaid | Spring | April | 31.5           | 24.6           | 49.06     | 8.04 | 6.52                    |

**Fig. S1.** Google Earth images showing the occurrence of *Avicennia marina* mangroves at Al Khor, Al Dhakhira, Semaisma, Al Mafyar, Fuwairit, Zekreet, Ras Laffan, Al-Wakra, Umm Al Hul, and Khor Al Adidm, in Qatar. The mangroves appear in dark green in the true color images. The topography at the mangrove occurrences shows a gradient decreasing from high land elevation to low elevation towards the sea. Measured elevation at the mangrove sites suggested that they are distributed at less than 3 m elevation.

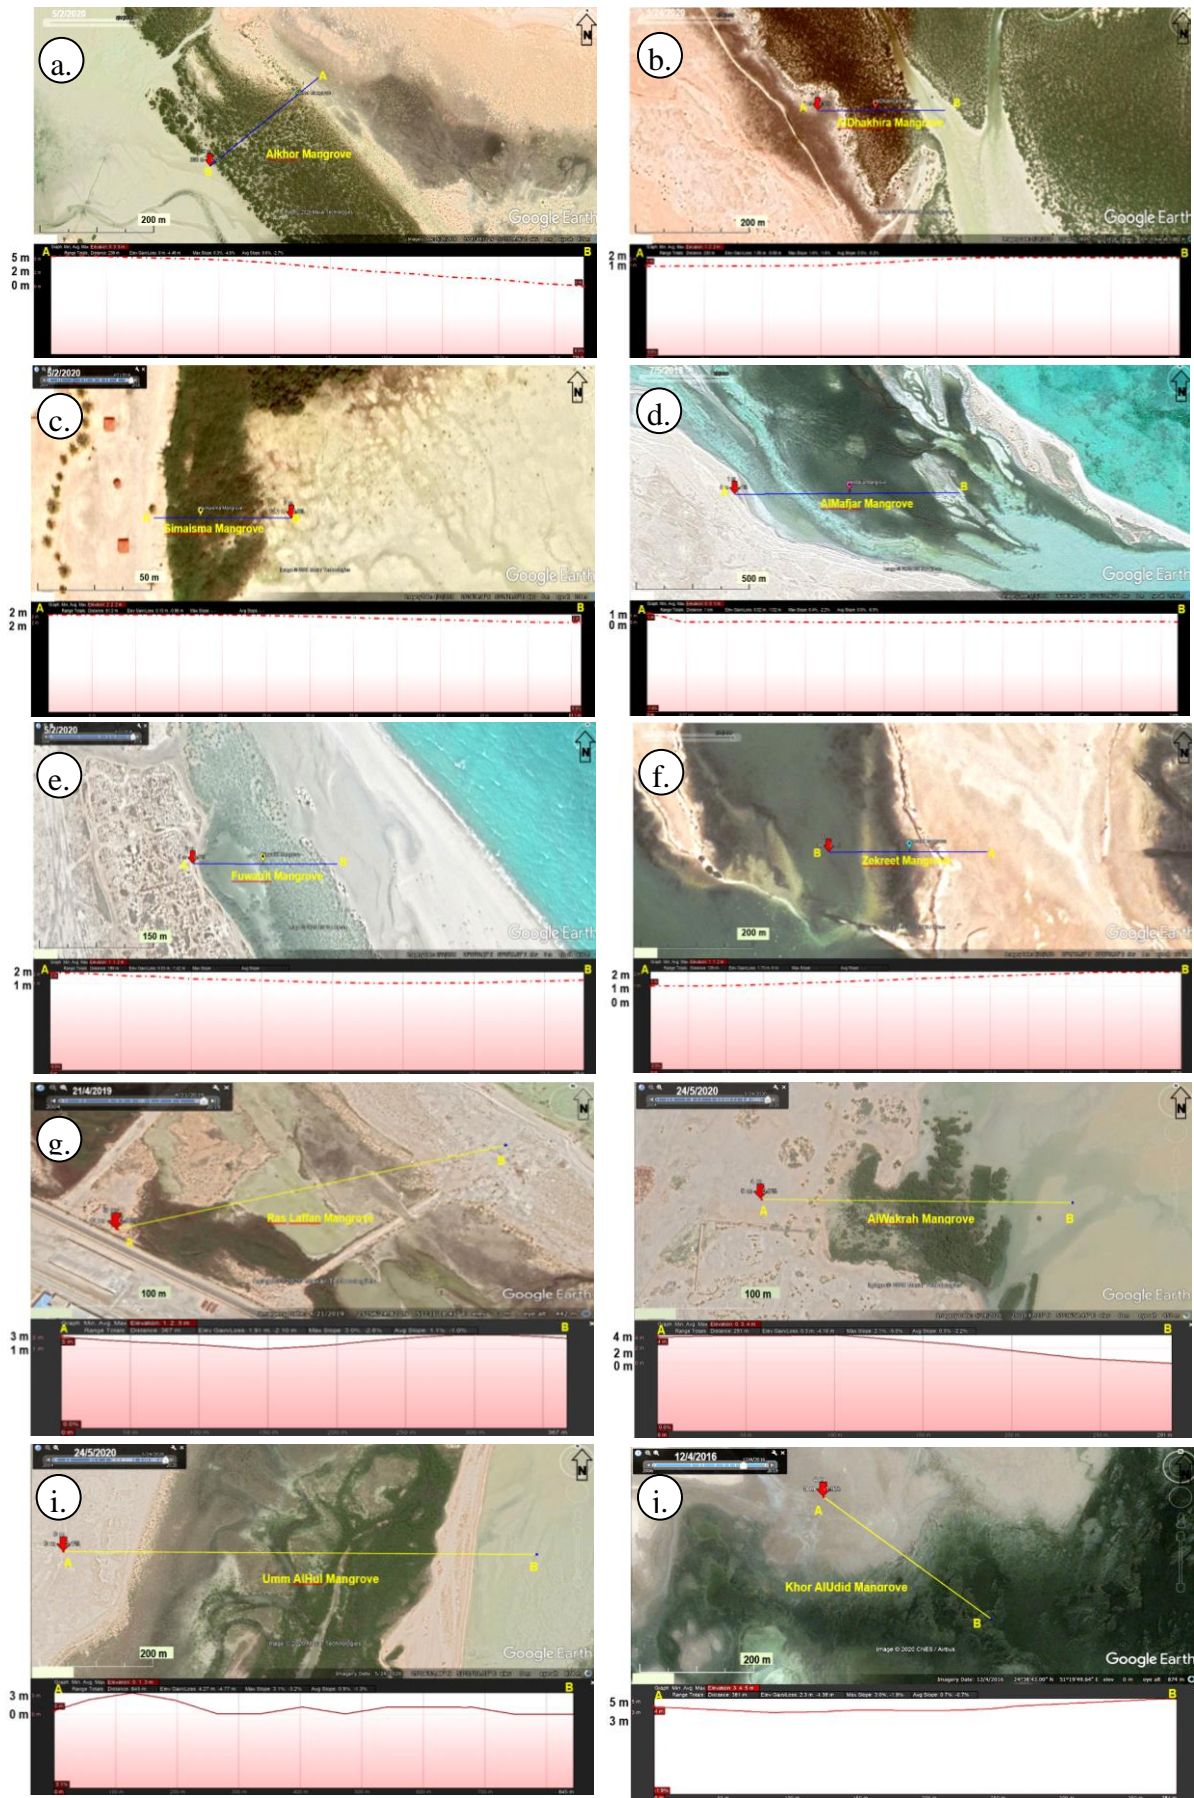



Fig S2. Photos of mangrove in Qatar

A. Stunted mangrove in Zeekret

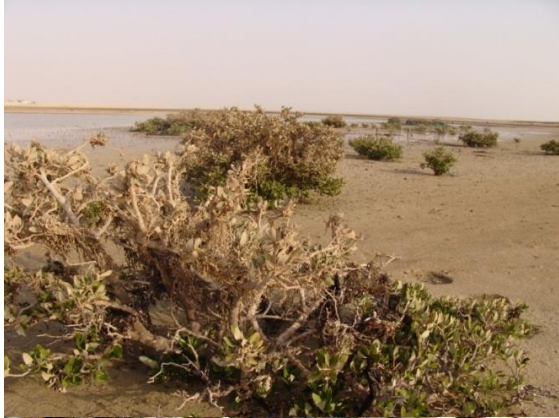

B. Natural mangrove in Al Dhakhira

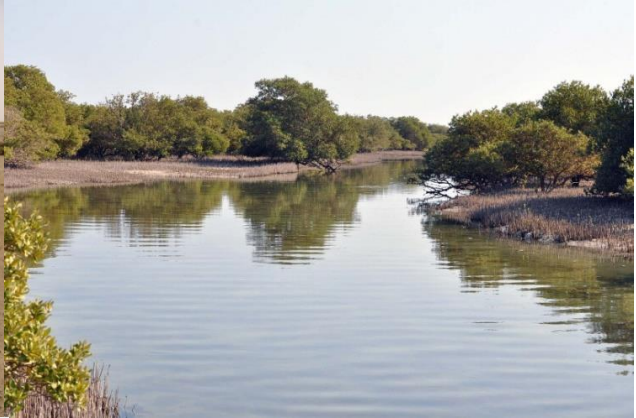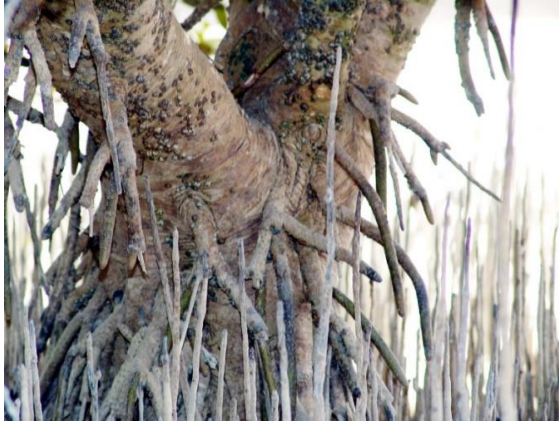

C. Stilt roots and pneumatophores

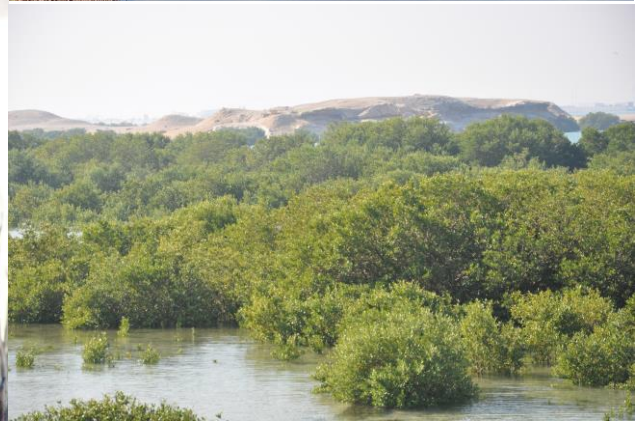

D. Natural mangrove in Al Dhakhira

A)

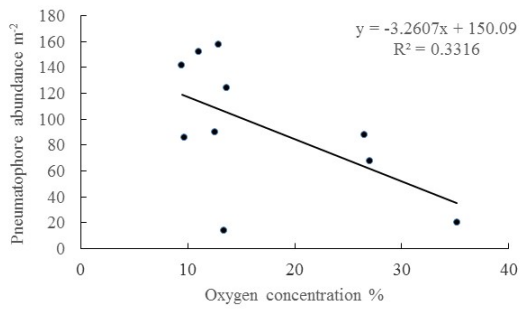

B)

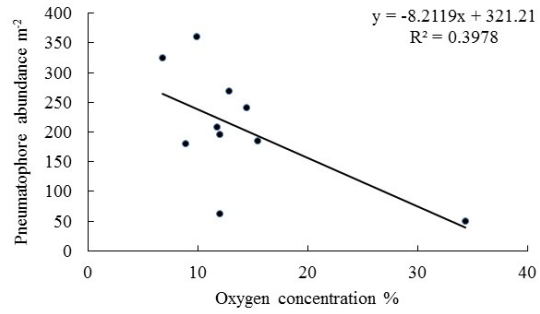

C)

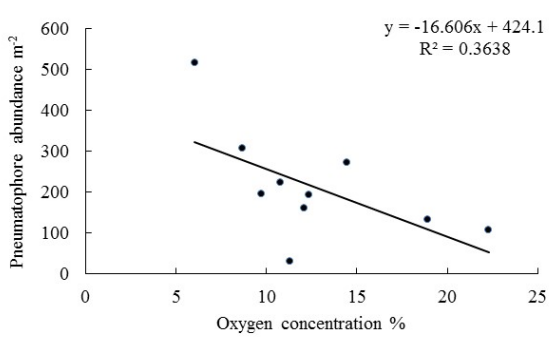

D)

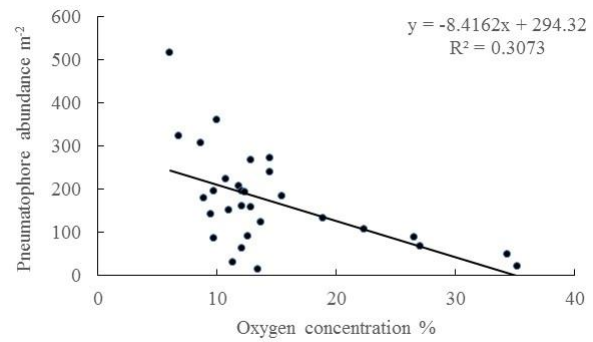

**Fig. S3.** Relationship between pneumatophore abundance and oxygen concentration in the A) upper tidal level, B) middle tidal level, C) lower tidal level, and D) all tidal levels combined.
